# Supplementary material
Source: PubMed Central journal article supplement (PMC10198824)
Supplement: 40261_2023_1265_MOESM1_ESM.pdf [file 40261_2023_1265_MOESM1_ESM.pdf]

## **Title Page**

### **Article category: Original articles**

**Title:** Evaluation of the Drug–Drug Interaction Potential of Ensitrelvir Fumaric Acid with Cytochrome P450 3A Substrates in Healthy Japanese Adults

**Authors:** Ryosuke Shimizu<sup>1,\*</sup>, Takuhiro Sonoyama<sup>2</sup>, Takahiro Fukuhara<sup>3</sup>, Aya Kuwata<sup>3</sup>, Takanobu Matsuzaki<sup>4</sup>, Yumiko Matsuo<sup>1,†</sup>, and Ryuji Kubota<sup>1</sup>

### **Affiliations:**

<sup>1</sup>Shionogi & Co., Ltd., Clinical Pharmacology & Pharmacokinetics Department, Osaka, Japan

<sup>2</sup>Shionogi & Co., Ltd., Medical Science Department, Osaka, Japan

<sup>3</sup>Shionogi & Co., Ltd., Clinical Research Department, Osaka, Japan

<sup>4</sup>Shionogi & Co., Ltd., Laboratory for Drug Discovery and Development., Osaka, Japan

<sup>†</sup>Present Address: Clinical Pharmacology, IDEC Inc., Tokyo, Japan

### **\*Corresponding Author**

Ryosuke Shimizu, Shionogi & Co., Ltd., Clinical Pharmacology & Pharmacokinetics Department

8F, Nissay Yodoyabashi East, 3-3-13 Imabashi, Chuo-ku, Osaka 541-0042, Japan

Phone: +81-6-6209-6962. Email: [ryosuke.shimizu@shionogi.co.jp](mailto:ryosuke.shimizu@shionogi.co.jp)

**Journal Name:** *Clinical Drug Investigation*

**Running Title:** DDI of Ensitrelvir and CYP3A substrates

## Supplementary Material

### Pharmacokinetics of ensitrelvir in DDI study

The plasma concentration-time profiles until 312 hours from last dose of ensitrelvir at 750/250 mg are shown in **Supplementary Fig. 1**.

### Supplementary Methods

All reagents and solvents used in CYP inhibition study were of analytical grade. Human liver microsomes were purchased from Sekisui XenoTech, LLC. Reversible and time-dependent inhibitory effects of ensitrelvir (0.1 to 100  $\mu\text{M}$ ) on major human liver CYP enzymes (CYP1A2, CYP2B6, CYP2C8, CYP2C9, CYP2C19, CYP2D6, and CYP3A [substrates: midazolam and testosterone]) were investigated using human liver microsomes and probe substrates at approximately 37°C in 50 mM potassium phosphate buffer (pH 7.4) with 3 mM  $\text{MgCl}_2$  and 1 mM EDTA. To investigate the type of TDI, preincubation of S-217622 for 30 minutes in liver microsome was performed with or without reduced form of  $\beta$ -nicotinamide adenine dinucleotide phosphate (NADPH) (**Supplementary Table 2**). The incubation with probe substrate was conducted for 5 min. The samples were centrifuged at  $920 \times g$  for 10 min at 10 °C, and the supernatant fractions were analyzed by LC-MS/MS.

To determine the inactivation parameters, ensitrelvir was preincubated in human liver microsomes and an NADPH-regenerating system for 0, 3, 6, 9, 15 and 30 min (**Supplementary Table 3**). An aliquot of the preincubation mixture was transferred to a second tube containing the probe substrate (30  $\mu\text{M}$  midazolam and 210  $\mu\text{M}$  testosterone), the incubation was continued for 5 min.

### Bioanalytical procedure

#### Chemicals and reagents

Ensitrelvir fumaric acid was developed in Shionogi & Co., Ltd. Dexamethasone, prednisolone, and midazolam were purchased from Fuji Film Wako Pure Chemical (Osaka, Japan). The stable isotopes showed in **Supplementary Fig. 2** were used as internal standard (IS). [ $^{13}\text{C}, ^2\text{H}_5$ ]-ensitrelvir was developed in Shionogi & Co., Ltd. [ $^2\text{H}_4$ ]-dexamethasone and [ $^2\text{H}_6$ ]-prednisolone were purchased from Alsachim (Illkirch Graffenstaden, France). [ $^2\text{H}_4$ ]-midazolam malate was purchased from Spelco (Darmstadt, Germany).

### **Plasma sample preparation**

Plasma sample (10  $\mu$ L, 100  $\mu$ L, 50  $\mu$ L, and 100  $\mu$ L) was used for determination of ensitrelvir, dexamethasone, prednisolone, and midazolam, respectively. Ensitrelvir and prednisolone, plasma samples were precipitated with acetonitrile containing the IS. After centrifugation, the supernatant was diluted to match with the component of the mobile phase of chromatographic separation. As for dexamethasone and midazolam, plasma samples were added the IS and extracted by solid phase extraction using OASIS HLB  $\mu$ Elution plate (Waters, Milford, MA, USA) and SOLA $\mu$  HRP plate (2mg/1mL; Thermo Fisher Scientific, Waltham, MA, USA), respectively.

### **Chromatographic and mass spectrometric conditions**

#### ***Ensitrelvir***

Thermo Fisher Scientific TSQ Altis (Waltham, MA, USA) with a Thermo Fisher Scientific Vanquish Binary Flex system was used in Part 1 (dexamethasone cohort and prednisolone cohort) and Sciex API4000 (Framingham, MA, USA) with a Shimadzu LC-20A system (Kyoto, Japan) was used in Part 2 (midazolam cohort) (**Supplementary Table 4**). The LC separation was achieved on a YMC-Triart C18 column (50 mm  $\times$  2.1 mm I.D., 3  $\mu$ m; YMC, Kyoto, Japan). Mobile phases were 0.1% formic acid for A and acetonitrile containing 0.1% formic acid for B (55:45, v/v), which was pumped at a flowrate of 0.5 mL/min..For MS detection, electrospray ionization (ESI) in the positive ion mode was used. The precursor/product ion transitions were m/z 532/145 for ensitrelvir, m/z 538/147 for [13C,2H5]-ensitrelvir.

#### ***Dexamethasone***

AB Sciex Triple Quad 4500 (Framingham, MA, USA) with a Shimadzu LC-20A and LC-30A system (Kyoto, Japan) was used. The LC separation was achieved on an Inertsil ODS-SP (50 mm  $\times$  2.1 mm I.D., 3  $\mu$ m; GL Sciences, Tokyo, Japan) (**Supplementary Table 4**). Mobile phases were 10 mmol/L

ammonium formate for A and methanol for B (40:60, v/v), which was pumped at a flowrate of 0.3 mL/min. For MS detection, ESI in the positive ion mode was used. The precursor/product ion transitions were m/z 393/355 for dexamethasone, m/z 397/359 for [2H4]-dexamethasone.

### ***Prednisolone***

AB Sciex API5000 (Framingham, MA, USA) with a Shimadzu UFLC system (Kyoto, Japan) was used. The LC separation was achieved on a LUNA Phenyl-Hexyl (100 mm ×2.0 mm I.D., 3 µm; Phenomenex, Torrance, CA, USA) (**Supplementary Table 4**). Mobile phases were 10 mmol/L ammonium formate containing 0.1% formic acid for A and acetonitrile containing 0.1% formic acid for B (75:25, v/v), which was pumped at a flowrate of 0.2 mL/min. For MS detection, ESI in the negative ion mode was used. The precursor/product ion transitions were m/z 405/329 for prednisolone, m/z 411/333 for [2H6]-prednisolone.

### ***Midazolam***

AB Sciex Triple Quad 6500 (Framingham, MA, USA) with a Shimadzu LC-30A system (Kyoto, Japan) was used. The LC separation was achieved on an InertSustain C18 HP (100 mm ×2.1 mm I.D., 3 µm; GL Sciences, Tokyo, Japan) (**Supplementary Table 4**). Mobile phases were 10 mmol/L ammonium acetate/0.1% acetic acid (1:1, v/v) for A and methanol for B. A linear elution gradient was set at a flow rate of 0.4mL/min with mobile phase consisted of 50% of A and 50% of B at 0min, and to reach 5% of A and 95% of B at 4.5min. For MS detection, ESI in the positive ion mode was used. The precursor/product ion transitions were m/z 326/291 for midazolam, m/z 330/295 for [2H4]-midazolam.

### **Validation**

Validation for each bioanalytical method was carried out according to the Japan MHLW guideline on bioanalytical method validation. The quantification range, the lower limit of quantification (LLOQ), and the values of linearity, accuracy, precision, and recovery are summarized in **Supplemental Table 4**.

## Supplementary Figures and Tables

**Supplementary Fig. 1:** Mean (SD) plasma concentration profile of ensitrelvir following multiple-dose administration of ensitrelvir, once daily for 5 days in the fasted state in Japanese healthy adult participants, until 408 hours after the initial administration of ensitrelvir: **(1a)** 750/250 mg (dexamethasone cohort); **(1b)** 750/250 mg (prednisolone cohort).

**Supplementary Fig. 2:** Chemical structures of [13C,2H5]-ensitrelvir, [2H4]-dexamethasone, [2H6]-prednisolone, and [2H3]-midazolam malate.

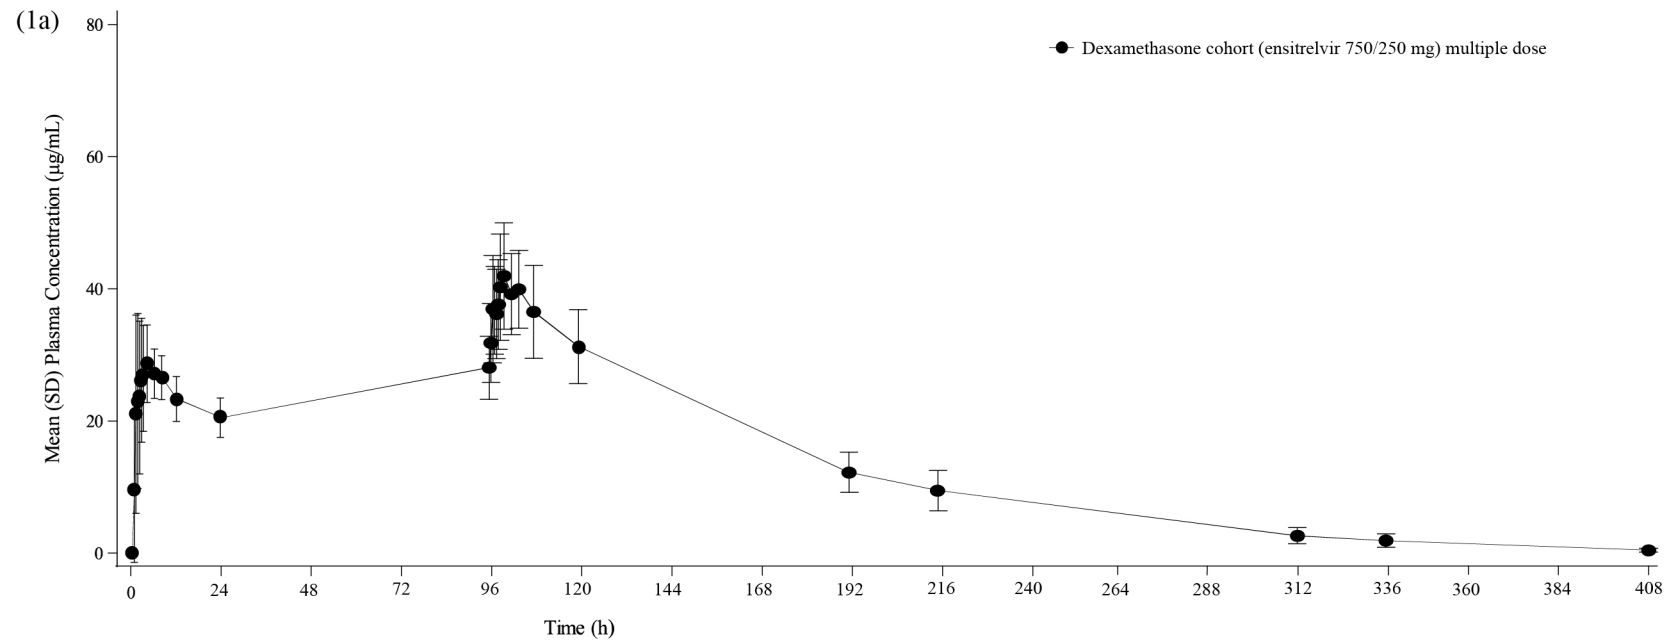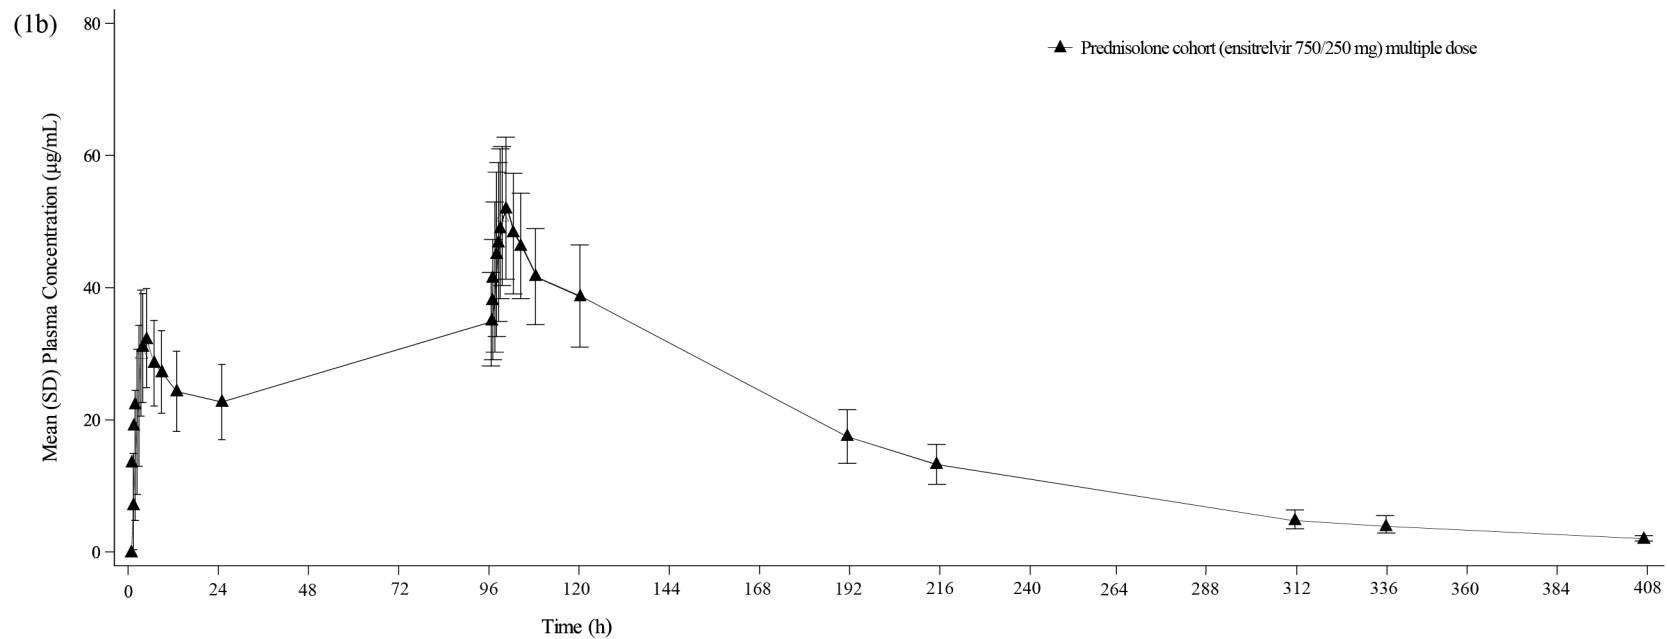

Fig 2

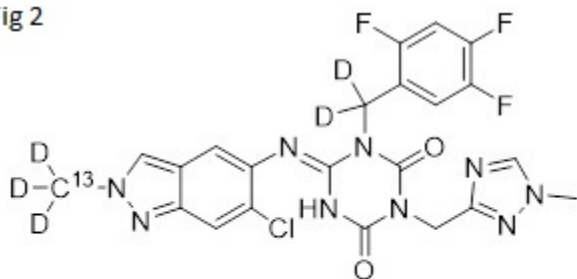

[13C,2H5]-ensitrelvir

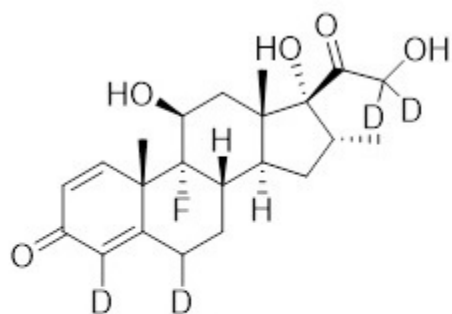

[2H4]-dexamethasone

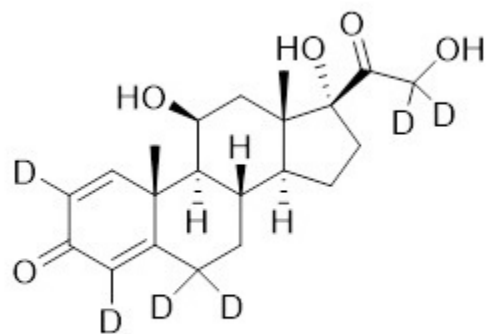

[2H6]-prednisolone

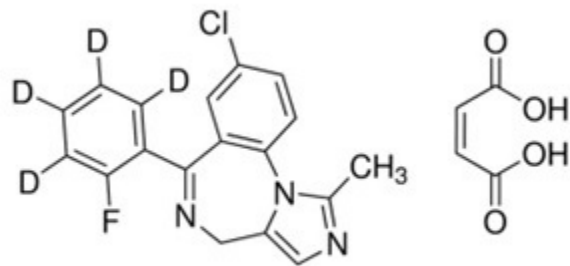

[2H4]-midazolam malate

**Supplementary Table 1:** Demographic and baseline characteristics of participants in each part.

|                              |           | Dexamethasone cohort<br>Ensitrelvir 750/250 mg +<br>Dexamethasone<br>N = 14 | Prednisolone cohort<br>Ensitrelvir 750/250 mg +<br>Prednisolone<br>N = 14 | Midazolam cohort<br>Ensitrelvir 375/125 mg +<br>Midazolam<br>N = 14 |
|------------------------------|-----------|-----------------------------------------------------------------------------|---------------------------------------------------------------------------|---------------------------------------------------------------------|
| Sex, male                    |           | 14 (100.0)                                                                  | 14 (100.0)                                                                | 14 (100.0)                                                          |
| Age, years                   | Mean (SD) | 35.0 (5.8)                                                                  | 31.9 (5.1)                                                                | 36.0 (7.4)                                                          |
|                              | Min       | 27                                                                          | 21                                                                        | 23                                                                  |
|                              | Median    | 35.5                                                                        | 31.0                                                                      | 35.5                                                                |
|                              | Max       | 45                                                                          | 39                                                                        | 47                                                                  |
| Height, cm                   | Mean (SD) | 170.25 (4.60)                                                               | 175.46 (4.27)                                                             | 172.26 (4.91)                                                       |
|                              | Min       | 159.9                                                                       | 166.7                                                                     | 164.1                                                               |
|                              | Median    | 170.00                                                                      | 174.90                                                                    | 173.30                                                              |
|                              | Max       | 179.6                                                                       | 181.2                                                                     | 179.5                                                               |
| Weight, kg                   | Mean (SD) | 68.01 (6.48)                                                                | 66.21 (7.68)                                                              | 65.17 (5.71)                                                        |
|                              | Min       | 54.1                                                                        | 55.3                                                                      | 57.8                                                                |
|                              | Median    | 69.50                                                                       | 64.80                                                                     | 64.00                                                               |
|                              | Max       | 77.1                                                                        | 84.8                                                                      | 75.4                                                                |
| BMI, kg/m <sup>2</sup>       | Mean (SD) | 23.29 (1.82)                                                                | 21.51 (2.24)                                                              | 22.04 (1.58)                                                        |
|                              | Min       | 19.4                                                                        | 18.8                                                                      | 19.7                                                                |
|                              | Median    | 23.75                                                                       | 21.25                                                                     | 22.00                                                               |
|                              | Max       | 25.5                                                                        | 27.6                                                                      | 24.8                                                                |
| Race, Asian                  | n (%)     | 14 (100.0)                                                                  | 14 (100.0)                                                                | 14 (100.0)                                                          |
| Alcohol usage                | n (%)     | 0                                                                           | 0                                                                         | 0                                                                   |
| Tobacco usage                | n (%)     | 0                                                                           | 0                                                                         | 0                                                                   |
| Caffeine usage               | n (%)     | 0                                                                           | 3 (21.4)                                                                  | 0                                                                   |
| SARS-CoV-2<br>test, negative | n (%)     | 14 (100.0)                                                                  | 14 (100.0)                                                                | 14 (100.0)                                                          |

The last values taken before the first administration were used if there were multiple results.

BMI, body mass index; Max, maximum; Min, minimum; N, number of participants; SARS-CoV-2, severe acute respiratory syndrome coronavirus 2; SD, standard deviation.



**Supplementary Table 2:** Time-dependent interaction of ensitrelvir with liver CYP enzymes (CYP1A2, CYP2B6, CYP2C8, CYP2C9, CYP2C19, CYP2D6, and CYP3A)

| Enzyme  | Probe substrate  | Probe substrate ( $\mu\text{M}$ ) <sup>a</sup> | Metabolite monitored           | Internal standard                 | IC <sub>50</sub> ( $\mu\text{M}$ ) |                                    |                                 | Potential for time dependent inhibition |
|---------|------------------|------------------------------------------------|--------------------------------|-----------------------------------|------------------------------------|------------------------------------|---------------------------------|-----------------------------------------|
|         |                  |                                                |                                |                                   | 0-min preincubation                | 30-min preincubation without NADPH | 30-min preincubation with NADPH |                                         |
| CYP1A2  | Phenacetin       | 90                                             | Acetaminophen                  | Acetaminophen-d4                  | > 100                              | > 100                              | > 100                           | No                                      |
| CYP2B6  | Efavirenz        | 5                                              | 8-Hydroxyefavirenz             | 8-Hydroxyefavirenz-d4             | > 100                              | > 100                              | > 100                           | No                                      |
| CYP2C8  | Amodiaquine      | 2                                              | N-Desethylamodiaquine          | N-Desethylamodiaquine-d5          | 35                                 | 34                                 | 34                              | No                                      |
| CYP2C9  | Diclofenac       | 12                                             | 4'-Hydroxydiclofenac           | 4'-Hydroxydiclofenac-d4           | > 100                              | > 100                              | > 100                           | No                                      |
| CYP2C19 | S-Mephenytoin    | 60                                             | 4'-Hydroxymephenytoin          | 4'-Hydroxymephenytoin-d3          | > 100                              | > 100                              | > 100                           | No                                      |
| CYP2D6  | Dextromethorphan | 10                                             | Dextrorphan                    | Dextrorphan-d3                    | > 100                              | > 100                              | > 100                           | No                                      |
| CYP3A   | Midazolam        | 3                                              | 1'-Hydroxymidazolam            | 1'-Hydroxymidazolam-d4            | > 100                              | > 100                              | 39                              | Yes (NADPH-dependent)                   |
| CYP3A   | Testosterone     | 60                                             | 6 $\beta$ -Hydroxytestosterone | 6 $\beta$ -Hydroxytestosterone-d3 | > 100                              | > 100                              | 81                              | Yes (NADPH-dependent)                   |

<sup>a</sup>Concentrations based on  $K_m$  value in the test system. Ensitrelvir showed a reversible inhibitory effect on CYP2C8 but not the other CYP enzymes including CYP3A, and the time-dependent inhibition with NADPH-dependent manner on CYP3A. According to the DDI guidelines [1-3], a mechanistic static model suggested that ensitrelvir inhibits CYP3A but not CYP2C8 in the clinical dosing regimen of ensitrelvir at 375/125 mg.

**Supplementary Table 3:** The inactivation parameters of enstirelvir on CYP3A

| <b>Enzyme</b> | <b>Substrate</b> | <b>K<sub>I</sub> (μM)</b> | <b>K<sub>inact</sub> (min<sup>-1</sup>)</b> |
|---------------|------------------|---------------------------|---------------------------------------------|
| CYP3A         | Midazolam        | 84                        | 0.046                                       |
|               | Testosterone     | 86                        | 0.055                                       |

K<sub>I</sub> half-maximal inactivation concentration

K<sub>inact</sub> maximal inactivation constant rate

**Supplementary Table 4: Summary of bioanalytical methods**

| Analyte                               | Emsitrelvir    |                | Dexamethasone | Prednisolone   | Midazolam      |
|---------------------------------------|----------------|----------------|---------------|----------------|----------------|
|                                       | Used in Part 1 | Used in Part 2 |               |                |                |
| <b>Quantification range (ng/mL)</b>   | 10.0 to 300000 | 200 to 200000  | 0.500 to 2000 | 2.00 to 2000   | 0.0500 to 400  |
| <b>LLOQ (ng/mL)</b>                   | 10.0           | 200            | 0.500         | 2.00           | 0.0500         |
| <b>Linearity (%)*</b>                 | 93.8 to 105.0  | 91.9 to 108.4  | 94.7 to 102.7 | 96.9 to 102.0  | 99.0 to 102.2  |
| <b>Between-run Precision (RSD, %)</b> | 1.3 to 3.2     | 6.4 to 10.1    | 1.3 to 3.0    | 1.1 to 3.1     | 2.4 to 7.0     |
| <b>Between-run Accuracy (%)</b>       | 92.3 to 107.8  | 99.1 to 104.0  | 97.5 to 102.0 | 101.0 to 105.7 | 100.8 to 108.8 |
| <b>Recovery (%)</b>                   | 98.0 to 105.3  | 82.6 to 87.2   | 94.9 to 108.9 | 100.6 to 102.4 | 83.8 to 86.8   |

\*Evaluated by mean accuracy of back-calculated concentration of calibration samples at each concentration level

### **Supplementary References**

1. Ministry of Health, Labour and Welfare in Japan. Pharmaceutical Safety and Environmental Health Bureau. Evaluation and Licensing Division. Guideline on drug interaction for drug development and appropriate provision of information. July 2018.
2. U.S. Department of Health and Human Services Food and Drug Administration Center for Drug Evaluation and Research. Guidance for Industry. In vitro Drug Interaction Studies—Cytochrome P450 Enzyme- and Transporter-Mediated Drug Interactions. January 2020.
3. European Medicines Agency. Committee for Human Medicinal Products. Guideline on the Investigation of Drug Interactions. January 2013.
